# Supplementary material
Source: publisher site journal article supplement (https://www.dovepress.com/article/542692)
Supplement: Supplementary file 1 [file SupplementalTable1%20Revised.docx]

**Supplemental Table 1.** Baseline Characteristics of Myopic Patients stratified by the Retina Sequelae of Myopia in TriNetX

| **Characteristic** | **Choroidal Neovascularization** | | **Myopic Macular Degeneration** | | **Foveoschisis** | |
| --- | --- | --- | --- | --- | --- | --- |
|  | **+** | ***P* valuea** | **+** | ***P* valuea** | **+** | ***P* valuea** |
| **Age, y** |  |  |  |  |  |  |
| 20 - 29 | 79 (4.20%) | <0.001 | 25 (4.13%) | <0.001 | 6 (3.85%) | <0.001 |
| 30 - 39 | 181 (9.62%) | 31 (5.12%) | 9 (5.77%) |
| 40 - 49 | 221 (11.75%) | 60 (9.92%) | 11 (7.05%) |
| 50 - 59 | 337 (17.92%) | 120 (19.83%) | 35 (22.44%) |
| 60 - 69 | 384 (20.41%) | 154 (25.45%) | 45 (28.85%) |
| 70 - 79 | 326 (17.33%) | 132 (21.82%) | 35 (22.44%) |
| 80 - 89 | 139 (7.39%) | 29 (4.79%) | 6 (3.85%) |
| ≥90 | 146 (7.76%) | 14 (2.31%) | 3 (1.92%) |
| **Sex** |  |  |  |  |  |  |
| Male | 716 (38.06%) | 0.04 | 227 (37.52%) | 0.16 | 37 (23.72%) | <0.001 |
| Female | 1165 (61.94%) | 378 (62.48%) | 119 (76.28%) |
| Unknown | 0 (0.00%) | 0 (0.00%) | 0 (0.00%) |
| **Race** |  |  |  |  |  |  |
| White | 1281 (68.10%) | <0.001 | 392 (64.79%) | <0.001 | 95 (60.90%) | <0.001 |
| Unknown | 179 (9.52%) | 37 (6.12%) | 10 (6.41%) |
| Asian | 61 (3.24%) | 62 (10.25%) | 17 (10.90%) |
| Black or African American | 252 (13.40%) | 66 (10.91%) | 21 (13.46%) |
| American Indian or Alaska Native | 6 (0.32%) | 1 (0.17%) | 3 (1.92%) |
| Native Hawaiian or Other Pacific Islander | 4 (0.21%) | 0 (0.00%) | 0 (0.00%) |
| **Ethnicity** |  |  |  |  |  |  |
| Hispanic or Latino | 169 (8.98%) | <0.001 | 49 (8.10%) | <0.001 | 13 (8.33%) | <0.001 |
| Not Hispanic or Latino | 1424 (75.70%) | 502 (82.98%) | 130 (83.33%) |
| Unknown | 288 (15.31%) | 54 (8.93%) | 13 (8.33%) |

| **Characteristic** | **Macular Hole** | | | **Foveal Retinal Detachment** | | **Rhegmatogenous Retinal Detachment** | |
| --- | --- | --- | --- | --- | --- | --- | --- |
|  | **+** | ***P* valuea** | **+** | | ***P* valuea** | **+** | ***P* valuea** |
| **Age, y** |  |  |  | |  |  |  |
| 20 - 29 | 40 (1.19%) | <0.001 | 6 (3.95%) | | 0.005 | 1112 (7.66%) | <0.001 |
| 30 - 39 | 70 (2.08%) | 21 (13.82%) | | 1399 (9.63%) |
| 40 - 49 | 162 (4.81%) | 18 (11.84%) | | 1769 (12.18%) |
| 50 - 59 | 497 (14.75%) | 34 (22.37%) | | 3043 (20.95%) |
| 60 - 69 | 1078 (31.99%) | 22 (14.47%) | | 3697 (25.45%) |
| 70 - 79 | 1026 (30.45%) | 18 (11.84%) | | 1972 (13.58%) |
| 80 - 89 | 293 (8.69%) | 4 (2.63%) | | 427 (2.94%) |
| ≥90 | 156 (4.63%) | 1 (0.66%) | | 194 (1.34%) |
| **Sex** |  |  |  | |  |  |  |
| Male | 1093 (32.43%) | <0.001 | 68 (44.74%) | | 0.28 | 6955 (47.88%) | <0.001 |
| Female | 2275 (67.51%) | 83 (54.61%) | | 7567 (52.10%) |
| Unknown | 0 (0.00%) | 0 (0.00%) | | 0 (0.00%) |
| **Race** |  |  |  | |  |  |  |
| White | 2430 (72.11%) | <0.001 | 105 (69.08%) | | 0.43 | 9828 (67.66%) | <0.001 |
| Unknown | 261 (7.74%) | 11 (7.24%) | | 1215 (8.36%) |
| Asian | 161 (4.78%) | 12 (7.89%) | | 780 (5.37%) |
| Black or African American | 413 (12.26%) | 23 (15.13%) | | 2061 (14.19%) |
| American Indian or Alaska Native | 11 (0.33%) | 0 (0.00%) | | 65 (0.45%) |
| Native Hawaiian or Other Pacific Islander | 3 (0.09%) | 0 (0.00%) | | 26 (0.18%) |
| **Ethnicity** |  |  |  | |  |  |  |
| Hispanic or Latino | 150 (4.45%) | <0.001 | 14 (9.21%) | | 0.002 | 1080 (7.44%) | 0.002 |
| Not Hispanic or Latino | 2758 (81.84%) | 127 (83.55%) | | 11266 (77.56%) |
| Unknown | 462 (13.71%) | 11 (7.24%) | | 2179 (15.00%) |

a P values represent chi-square test results comparing the prevenance of those with each retinal sequelae to those without the respective sequelae.
